# Supplementary material for: Update of the Planktonic Diatom Genus Pseudo-nitzschia in Aotearoa New Zealand Coastal Waters: Genetic Diversity and Toxin Production
Source: MDPI journal article supplement (doi:10.3390/toxins13090637), 2021-09-10
Supplement: s1 [file s1]

**Table S1.** Details of 22 sampling sites in New Zealand between 2018 and 2020.

| Climate zone   | Island         | Sampling site code <sup>a</sup> | Sampling date                      | Location of sampling site                   | Latitude, Longitude | Sampling depth (m) |
|----------------|----------------|---------------------------------|------------------------------------|---------------------------------------------|---------------------|--------------------|
| Subtropical    | North Island   | 1                               | 2018 or 2019, and 2020 January 14  | Kerikeri, Far North, Northland              | -35.1986, 174.0602  | 0–9 (0+3+6+9)      |
|                |                | 2                               | 2018 November 27 and 2020 June 22  | Tapeka Point, Russell, Far North, Northland | -35.2451, 174.1179  | 0                  |
|                |                | 3                               | 2020 July 20                       | Bream Bay, Whangārei, Northland             | -35.8838, 174.4697  | 7                  |
|                |                | 4                               | 2020 July 13                       | Ōpōtiki, Ōpōtiki, Bay of Plenty             | -37.9079, 177.2161  | 0, 5, 10, and 15   |
| Warm temperate | South Island   | 5                               | 2018 or 2019, and 2020 June 21     | Collingwood Farms, Tasman, Tasman           | -40.6550, 172.7172  | 0–12               |
|                |                | 6                               | 2020 June 21                       | Tākaka, Tasman, Tasman                      | -40.8162, 172.8126  | 0–12               |
|                |                | 7                               | 2020 June 21                       | Bomber Port, Motueka, Tasman, Tasman        | -41.1193, 173.0447  | 0–12               |
|                |                | 8                               | 2020 June 23 and 30                | Oyster Bay, Marlborough, Marlborough        | -41.0458, 173.7196  | 0–15               |
|                |                | 9                               | 2020 June 30                       | Hallam Cove, Marlborough, Marlborough       | -40.9958, 173.8246  | 0–15               |
|                |                | 10                              | 2019 April 16 and 2020 July 20     | Pukatea Bay, Tasman, Tasman                 | -40.9564, 173.8967  | 0–15               |
|                |                | 11                              | 2020 June 23                       | Cannon Hill, Marlborough, Marlborough       | -40.9475, 173.9738  | 0–15               |
|                |                | 12                              | 2020 July 07                       | Brightlands Bay, Marlborough, Marlborough   | -41.0612, 173.8544  | 0–15               |
|                |                | 13                              | 2020 January                       | Richmond Bay, Marlborough, Marlborough      | -41.0102, 173.9665  | 0–15               |
|                |                | 14                              | 2020 January and 2020 July 13      | Crail Bay, Marlborough, Marlborough         | -41.1147, 173.9656  | 0–15               |
|                |                | 15                              | 2019 October and 2020 July 13      | Beatrix Bay, Marlborough, Marlborough       | -41.0306, 174.0054  | 0–15               |
|                |                | 16                              | 2020 July 13                       | Laverique Bay, Marlborough, Marlborough     | -41.0530, 174.0455  | 0–15               |
|                |                | 17                              | 2019 October                       | Waitaria Bay, Marlborough, Marlborough      | -41.1677, 174.0330  | 0–15               |
|                |                | 18                              | 2020 June 24                       | Horahora, Marlborough, Marlborough          | -41.3307, 174.1360  | 0–15               |
|                |                | 19                              | 2019 May 01                        | Opihi Bay, Marlborough, Marlborough         | -41.2938, 174.1452  | 0–15               |
|                |                | 20                              | 2019 May 01 and 2020 June 24       | Whangakoko Bay, Marlborough, Marlborough    | -41.2961, 174.1656  | 0–15               |
| Cold temperate | Stewart Island | 21                              | 2020 July 06, 19, and November 22  | Big Glory Bay, Southland, Southland         | -46.9700, 168.1172  | 0–10               |
|                |                | 22                              | 2019 March 17 and 2020 November 22 | Big Glory Bay, Southland, Southland         | -46.98, 168.11      | 0–10               |

<sup>a</sup> Sampling site code shown in Figure 4.

**Table S2.** Details of 130 clonal strains of *Pseudo-nitzschia* established from New Zealand between 2018 and 2020. NR: sequence determined but not registered as it was identical to the other registered sequences of each species/clade/subclade. ND: not detected. -: sequence not determined or toxin production not tested.

| Species               | Clade/<br>subclade | Sequence<br>type (ST) <sup>a</sup> of<br>the ITS<br>region | Strain name<br>in CICCMB <sup>b</sup> | Strain name  | Sampling<br>site code <sup>c</sup> | Sampling date    | Isolater                   | DDBJ <sup>d</sup> accession<br>number for the ITS<br>region | DDBJ <sup>d</sup> accession<br>number for the LSU<br>rDNA D1–D3 | DA and/or DA<br>isomers<br>production <sup>e</sup> |
|-----------------------|--------------------|------------------------------------------------------------|---------------------------------------|--------------|------------------------------------|------------------|----------------------------|-------------------------------------------------------------|-----------------------------------------------------------------|----------------------------------------------------|
| <i>P. americana</i>   |                    |                                                            |                                       | PB024Ps03    | 3                                  | 2020 July 20     | T. Nishimura               | LC636495                                                    | -                                                               | ND                                                 |
| <i>P. americana</i>   |                    |                                                            |                                       | PB024Ps04    | 3                                  | 2020 July 20     | T. Nishimura               | NR                                                          | -                                                               | -                                                  |
| <i>P. americana</i>   |                    |                                                            |                                       | PB024Ps09    | 3                                  | 2020 July 20     | T. Nishimura               | NR                                                          | -                                                               | -                                                  |
| <i>P. americana</i>   |                    |                                                            |                                       | G005Ps02     | 7                                  | 2020 June 21     | T. Nishimura               | LC636496                                                    | -                                                               | ND                                                 |
| <i>P. americana</i>   |                    |                                                            | CAWB138                               | G018Ps01     | 10                                 | 2020 July 20     | T. Nishimura               | LC636497                                                    | LC636556                                                        | ND                                                 |
| <i>P. americana</i>   |                    |                                                            |                                       | G031Ps01     | 16                                 | 2020 July 13     | H. Bowers and T. Nishimura | NR                                                          | -                                                               | ND                                                 |
| <i>P. arenysensis</i> |                    |                                                            | CAWB139                               | PA030Ps01    | 2                                  | 2020 June 22     | T. Nishimura               | LC636498                                                    | -                                                               | ND                                                 |
| <i>P. arenysensis</i> |                    |                                                            |                                       | PA030Ps04    | 2                                  | 2020 June 22     | T. Nishimura               | LC636499                                                    | -                                                               | ND                                                 |
| <i>P. arenysensis</i> |                    |                                                            |                                       | PA030Ps05    | 2                                  | 2020 June 22     | T. Nishimura               | NR                                                          | -                                                               | -                                                  |
| <i>P. arenysensis</i> |                    |                                                            | CAWB131                               | Psd-5        | 10                                 | 2019 April 16    | M. Balci                   | LC636500                                                    | LC636557                                                        | ND                                                 |
| <i>P. arenysensis</i> |                    |                                                            | CAWB132                               | Psd-6        | 10                                 | 2019 April 16    | M. Balci                   | LC636501                                                    | LC636558                                                        | ND                                                 |
| <i>P. arenysensis</i> |                    |                                                            | CAWB133                               | Psd-7        | 10                                 | 2019 April 16    | M. Balci                   | -                                                           | LC636559                                                        | ND                                                 |
| <i>P. arenysensis</i> |                    |                                                            | CAWB134                               | Psd-8        | 10                                 | 2019 April 16    | M. Balci                   | -                                                           | LC636560                                                        | ND                                                 |
| <i>P. australis</i>   |                    | ST1                                                        |                                       | PD009Ps05    | 4                                  | 2020 July 13     | T. Nishimura               | LC636502                                                    | -                                                               | Produced                                           |
| <i>P. australis</i>   |                    | ST1                                                        | CAWB140                               | G007Ps03     | 6                                  | 2020 June 21     | T. Nishimura               | LC636503                                                    | LC636561                                                        | Produced                                           |
| <i>P. australis</i>   |                    | ST1                                                        |                                       | G010Ps02     | 9                                  | 2020 June 30     | T. Nishimura               | NR                                                          | -                                                               | -                                                  |
| <i>P. australis</i>   |                    | ST1                                                        |                                       | G010Ps03     | 9                                  | 2020 June 30     | T. Nishimura               | NR                                                          | -                                                               | -                                                  |
| <i>P. australis</i>   |                    | ST1                                                        |                                       | G027Ps01     | 12                                 | 2020 July 07     | T. Nishimura               | LC636504                                                    | -                                                               | Produced                                           |
| <i>P. australis</i>   |                    | ST1                                                        |                                       | G027Ps02     | 12                                 | 2020 July 07     | T. Nishimura               | NR                                                          | -                                                               | -                                                  |
| <i>P. australis</i>   |                    | ST1                                                        |                                       | G015Ps04     | 14                                 | 2020 July 13     | H. Bowers and T. Nishimura | LC636505                                                    | LC636562                                                        | Produced                                           |
| <i>P. australis</i>   |                    | ST1                                                        |                                       | G037Ps01     | 16                                 | 2020 July 13     | H. Bowers and T. Nishimura | LC636506                                                    | -                                                               | Produced                                           |
| <i>P. australis</i>   |                    | ST1                                                        |                                       | G037Ps02     | 16                                 | 2020 July 13     | H. Bowers and T. Nishimura | NR                                                          | -                                                               | -                                                  |
| <i>P. australis</i>   |                    | ST1                                                        |                                       | J328Ps20     | 21                                 | 2020 November 22 | T. Nishimura               | LC636507                                                    | -                                                               | Produced                                           |
| <i>P. australis</i>   |                    | ST1                                                        |                                       | J237Ps07     | 22                                 | 2020 November 22 | T. Nishimura               | LC636508                                                    | -                                                               | Produced                                           |
| <i>P. australis</i>   |                    | ST2                                                        |                                       | G018Ps02     | 10                                 | 2020 July 20     | T. Nishimura               | LC636509                                                    | LC636563                                                        | Produced                                           |
| <i>P. australis</i>   |                    | ST2                                                        |                                       | G018Ps03     | 10                                 | 2020 July 20     | T. Nishimura               | NR                                                          | -                                                               | -                                                  |
| <i>P. australis</i>   |                    | ST2                                                        |                                       | G018Ps04     | 10                                 | 2020 July 20     | T. Nishimura               | LC636510                                                    | -                                                               | Produced                                           |
| <i>P. calliantha</i>  |                    | ST1                                                        | CAWB135                               | Crail Bay    | 14                                 | 2020 January     | L. L. Rhodes               | LC636511                                                    | LC636564                                                        | ND                                                 |
| <i>P. calliantha</i>  |                    | ST2                                                        |                                       | Waitaria Bay | 17                                 | 2019 October     | S. Challenger              | LC636512                                                    | LC636565                                                        | ND                                                 |
| <i>P. calliantha</i>  |                    | ST3                                                        |                                       | Richmond Bay | 13                                 | 2020 January     | L. L. Rhodes               | LC636513                                                    | LC636566                                                        | ND                                                 |
| <i>P. cuspidata</i>   | clade Ia           |                                                            | CAWB141                               | PA030Ps10    | 2                                  | 2020 June 22     | T. Nishimura               | LC636514                                                    | LC636567                                                        | Produced (trace)                                   |

|                         |             |         |           |    |                  |                            |          |          |    |
|-------------------------|-------------|---------|-----------|----|------------------|----------------------------|----------|----------|----|
| <i>P. delicatissima</i> | subclade I  | CAWB136 | PA014Ps04 | 1  | 2020 January 14  | T. Nishimura               | LC636515 | LC636568 | ND |
| <i>P. delicatissima</i> | subclade I  |         | PA014Ps05 | 1  | 2020 January 14  | T. Nishimura               | LC636516 | LC636569 | ND |
| <i>P. delicatissima</i> | subclade I  |         | PA014Ps11 | 1  | 2020 January 14  | T. Nishimura               | LC636517 | LC636570 | ND |
| <i>P. delicatissima</i> | subclade I  | CAWB142 | PA030Ps06 | 2  | 2020 June 22     | T. Nishimura               | LC636518 | -        | ND |
| <i>P. delicatissima</i> | subclade I  |         | PA030Ps11 | 2  | 2020 June 22     | T. Nishimura               | LC636519 | -        | ND |
| <i>P. delicatissima</i> | subclade II | CAWB143 | G013Ps03  | 8  | 2020 June 23     | T. Nishimura               | LC636520 | LC636571 | ND |
| <i>P. delicatissima</i> | subclade II |         | G013Ps04  | 8  | 2020 June 23     | T. Nishimura               | LC636521 | -        | ND |
| <i>P. delicatissima</i> | subclade II |         | G013Ps05  | 8  | 2020 June 23     | T. Nishimura               | NR       | -        | -  |
| <i>P. delicatissima</i> | subclade II |         | G013Ps08  | 8  | 2020 June 23     | T. Nishimura               | NR       | -        | -  |
| <i>P. delicatissima</i> | subclade II |         | G013Ps10  | 8  | 2020 June 23     | T. Nishimura               | NR       | -        | -  |
| <i>P. delicatissima</i> | subclade II |         | G013Ps12  | 8  | 2020 June 23     | T. Nishimura               | NR       | -        | -  |
| <i>P. delicatissima</i> | subclade II |         | G013Ps13  | 8  | 2020 June 30     | H. Bowers and T. Nishimura | NR       | -        | -  |
| <i>P. delicatissima</i> | subclade II |         | G013Ps14  | 8  | 2020 June 30     | H. Bowers and T. Nishimura | NR       | -        | -  |
| <i>P. delicatissima</i> | subclade II |         | G013Ps15  | 8  | 2020 June 30     | H. Bowers and T. Nishimura | NR       | -        | -  |
| <i>P. delicatissima</i> | subclade II |         | G013Ps16  | 8  | 2020 June 30     | T. Nishimura               | NR       | -        | -  |
| <i>P. delicatissima</i> | subclade II | CAWB144 | J328Ps01  | 21 | 2020 July 06     | H. Bowers and T. Nishimura | LC636522 | LC636572 | ND |
| <i>P. delicatissima</i> | subclade II |         | J328Ps02  | 21 | 2020 July 06     | H. Bowers and T. Nishimura | LC636523 | -        | ND |
| <i>P. delicatissima</i> | subclade II |         | J328Ps03  | 21 | 2020 July 06     | H. Bowers and T. Nishimura | NR       | -        | -  |
| <i>P. delicatissima</i> | subclade II |         | J328Ps04  | 21 | 2020 July 06     | H. Bowers and T. Nishimura | NR       | -        | -  |
| <i>P. delicatissima</i> | subclade II |         | J328Ps05  | 21 | 2020 July 06     | H. Bowers and T. Nishimura | NR       | -        | -  |
| <i>P. delicatissima</i> | subclade II |         | J328Ps06  | 21 | 2020 July 06     | H. Bowers and T. Nishimura | NR       | -        | -  |
| <i>P. delicatissima</i> | subclade II |         | J328Ps07  | 21 | 2020 July 19     | T. Nishimura               | NR       | -        | -  |
| <i>P. delicatissima</i> | subclade II |         | J328Ps08  | 21 | 2020 July 19     | T. Nishimura               | NR       | -        | -  |
| <i>P. delicatissima</i> | subclade II |         | J328Ps09  | 21 | 2020 July 19     | T. Nishimura               | NR       | -        | -  |
| <i>P. delicatissima</i> | subclade II |         | J328Ps10  | 21 | 2020 July 19     | T. Nishimura               | NR       | -        | -  |
| <i>P. delicatissima</i> | subclade II |         | J328Ps11  | 21 | 2020 July 19     | T. Nishimura               | NR       | -        | -  |
| <i>P. delicatissima</i> | subclade II |         | J328Ps14  | 21 | 2020 November 22 | T. Nishimura               | NR       | -        | -  |
| <i>P. delicatissima</i> | subclade II |         | J328Ps17  | 21 | 2020 November 22 | T. Nishimura               | NR       | -        | -  |
| <i>P. fraudulent</i>    |             |         | 828       | 1  | 2018 or 2019     | S. Challenger              | -        | LC636573 | -  |
| <i>P. fraudulent</i>    |             |         | G013Ps02  | 8  | 2020 June 23     | T. Nishimura               | NR       | -        | ND |
| <i>P. fraudulent</i>    |             |         | G013Ps09  | 8  | 2020 June 23     | T. Nishimura               | NR       | -        | -  |
| <i>P. fraudulent</i>    |             | CAWB145 | G015Ps01  | 14 | 2020 July 13     | H. Bowers                  | LC636524 | LC636574 | ND |
| <i>P. fraudulent</i>    |             |         | G015Ps03  | 14 | 2020 July 13     | H. Bowers                  | NR       | -        | -  |
| <i>P. fraudulent</i>    |             |         | G011Ps04  | 20 | 2020 June 24     | T. Nishimura               | NR       | -        | ND |
| <i>P. fraudulent</i>    |             |         | J328Ps12  | 21 | 2020 July 19     | T. Nishimura               | NR       | -        | -  |
| <i>P. fraudulent</i>    |             |         | J328Ps13  | 21 | 2020 July 19     | T. Nishimura               | NR       | -        | -  |
| <i>P. fraudulent</i>    |             |         | J328Ps16  | 21 | 2020 November 22 | T. Nishimura               | LC636525 | -        | ND |

|                        |          |         |           |           |                  |               |              |          |                  |    |
|------------------------|----------|---------|-----------|-----------|------------------|---------------|--------------|----------|------------------|----|
| <i>P. fraudulenta</i>  |          |         | J328Ps18  | 21        | 2020 November 22 | T. Nishimura  | NR           | -        | -                |    |
| <i>P. fraudulenta</i>  |          |         | J328Ps19  | 21        | 2020 November 22 | T. Nishimura  | NR           | -        | -                |    |
| <i>P. fraudulenta</i>  |          | CAWB128 | Kiwa1     | 22        | 2019 March 17    | S. Challenger | -            | LC636575 | ND               |    |
| <i>P. fraudulenta</i>  |          |         | Kiwa2     | 22        | 2019 March 17    | S. Challenger | -            | LC636576 | -                |    |
| <i>P. galaxiae</i>     |          | CAWB153 | PA014Ps01 | 1         | 2020 January 14  | T. Nishimura  | LC636526     | LC636577 | ND               |    |
| <i>P. galaxiae</i>     |          | CAWB154 | PA014Ps07 | 1         | 2020 January 14  | T. Nishimura  | LC636527     | LC636578 | ND               |    |
| <i>P. hasleana</i>     | clade I  | CAWB146 | G007Ps01  | 6         | 2020 June 21     | T. Nishimura  | LC636528     | LC636579 | ND               |    |
| <i>P. hasleana</i>     | clade I  | CAWB147 | G007Ps02  | 6         | 2020 June 21     | T. Nishimura  | LC636529     | -        | ND               |    |
| <i>P. hasleana</i>     | clade II | CAWB156 | J328Ps15  | 21        | 2020 November 22 | T. Nishimura  | LC636530     | LC636580 | ND               |    |
| <i>P. hasleana</i>     | clade II |         | J237Ps01  | 22        | 2020 November 22 | T. Nishimura  | LC636531     | -        | -                |    |
| <i>P. hasleana</i>     | clade II |         | J237Ps02  | 22        | 2020 November 22 | T. Nishimura  | LC636532     | -        | -                |    |
| <i>P. hasleana</i>     | clade II | CAWB155 | J237Ps05  | 22        | 2020 November 22 | T. Nishimura  | LC636533     | LC636581 | ND               |    |
| <i>P. multiseriis</i>  |          | CAWB149 | G001Ps03  | 5         | 2020 June 21     | T. Nishimura  | LC636534     | LC636582 | Produced         |    |
| <i>P. multiseriis</i>  |          |         | G001Ps04  | 5         | 2020 June 21     | T. Nishimura  | LC636535     | -        | Produced         |    |
| <i>P. multiseriis</i>  |          |         | G007Ps04  | 6         | 2020 June 21     | T. Nishimura  | LC636536     | -        | Produced         |    |
| <i>P. multiseriis</i>  |          |         | G010Ps10  | 9         | 2020 June 30     | T. Nishimura  | LC636537     | -        | Produced         |    |
| <i>P. multistriata</i> | ST1      | CAWB137 | PA014Ps09 | 1         | 2020 January 14  | T. Nishimura  | LC636538     | LC636583 | ND               |    |
| <i>P. multistriata</i> | ST1      |         | PA014Ps10 | 1         | 2020 January 14  | T. Nishimura  | LC636539     | LC636584 | ND               |    |
| <i>P. multistriata</i> | ST1      |         | G013Ps21  | 8         | 2020 June 30     | T. Nishimura  | LC636540     | -        | ND               |    |
| <i>P. multistriata</i> | ST1      |         | G013Ps22  | 8         | 2020 June 30     | T. Nishimura  | NR           | -        | -                |    |
| <i>P. multistriata</i> | ST1      |         | G027Ps06  | 12        | 2020 July 07     | T. Nishimura  | LC636541     | -        | Produced (trace) |    |
| <i>P. multistriata</i> | ST2      | CAWB127 | 827       | 2         | 2018 November 27 | S. Challenger | LC636542     | LC636585 | ND               |    |
| <i>P. multistriata</i> | ST2      | CAWB150 | PB024Ps01 | 3         | 2020 July 20     | T. Nishimura  | LC636543     | -        | ND               |    |
| <i>P. multistriata</i> | ST2      |         | PB024Ps02 | 3         | 2020 July 20     | T. Nishimura  | NR           | -        | -                |    |
| <i>P. multistriata</i> | ST2      |         | PB024Ps05 | 3         | 2020 July 20     | T. Nishimura  | NR           | -        | -                |    |
| <i>P. multistriata</i> | ST2      |         | PB024Ps07 | 3         | 2020 July 20     | T. Nishimura  | NR           | -        | -                |    |
| <i>P. multistriata</i> | ST2      |         | PB024Ps08 | 3         | 2020 July 20     | T. Nishimura  | NR           | -        | -                |    |
| <i>P. multistriata</i> | ST2      |         | G001Ps01  | 5         | 2020 June 21     | T. Nishimura  | LC636544     | -        | Produced (trace) |    |
| <i>P. multistriata</i> | ST2      |         | G001Ps02  | 5         | 2020 June 21     | T. Nishimura  | LC636545     | LC636586 | ND               |    |
| <i>P. plurisecta</i>   |          | CAWB151 | G027Ps03  | 12        | 2020 July 07     | T. Nishimura  | LC636546     | LC636587 | ND               |    |
| <i>P. pungens</i>      | clade I  | ST1     | CAWB152   | PA030Ps03 | 2                | 2020 June 22  | T. Nishimura | LC636547 | LC636588         | ND |
| <i>P. pungens</i>      | clade I  | ST1     |           | PA030Ps08 | 2                | 2020 June 22  | T. Nishimura | NR       | -                | -  |
| <i>P. pungens</i>      | clade I  | ST1     |           | G007Ps06  | 6                | 2020 June 21  | T. Nishimura | NR       | -                | ND |
| <i>P. pungens</i>      | clade I  | ST1     |           | G005Ps01  | 7                | 2020 June 21  | T. Nishimura | NR       | -                | ND |
| <i>P. pungens</i>      | clade I  | ST1     |           | G005Ps04  | 7                | 2020 June 21  | T. Nishimura | NR       | -                | -  |
| <i>P. pungens</i>      | clade I  | ST1     |           | G010Ps01  | 9                | 2020 June 30  | T. Nishimura | NR       | -                | ND |
| <i>P. pungens</i>      | clade I  | ST1     |           | G010Ps04  | 9                | 2020 June 30  | T. Nishimura | NR       | -                | -  |

|                       |         |         |             |       |                  |               |          |          |          |
|-----------------------|---------|---------|-------------|-------|------------------|---------------|----------|----------|----------|
| <i>P. pungens</i>     | clade I | ST1     | G010Ps06    | 9     | 2020 June 30     | T. Nishimura  | NR       | -        | -        |
| <i>P. pungens</i>     | clade I | ST1     | G010Ps07    | 9     | 2020 June 30     | T. Nishimura  | NR       | -        | -        |
| <i>P. pungens</i>     | clade I | ST1     | G010Ps08    | 9     | 2020 June 30     | T. Nishimura  | NR       | -        | -        |
| <i>P. pungens</i>     | clade I | ST1     | G018Ps05    | 10    | 2020 July 20     | T. Nishimura  | NR       | -        | ND       |
| <i>P. pungens</i>     | clade I | ST1     | Beatrix Bay | 15    | 2019 October     | S. Challenger | LC636548 | -        | ND       |
| <i>P. pungens</i>     | clade I | ST1     | G011Ps01    | 20    | 2020 June 24     | T. Nishimura  | NR       | -        | ND       |
| <i>P. pungens</i>     | clade I | ST1     | G011Ps02    | 20    | 2020 June 24     | T. Nishimura  | NR       | -        | -        |
| <i>P. pungens</i>     | clade I | ST1     | G011Ps05    | 20    | 2020 June 24     | T. Nishimura  | NR       | -        | -        |
| <i>P. pungens</i>     | clade I | ST1     | G011Ps07    | 20    | 2020 June 24     | T. Nishimura  | NR       | -        | -        |
| <i>P. pungens</i>     | clade I | ST1     | G011Ps08    | 20    | 2020 June 24     | T. Nishimura  | NR       | -        | -        |
| <i>P. pungens</i>     | clade I | ST1     | G011Ps09    | 20    | 2020 June 24     | T. Nishimura  | NR       | -        | -        |
| <i>P. pungens</i>     | clade I | ST1     | J328Ps21    | 21    | 2020 November 22 | T. Nishimura  | LC636549 | -        | ND       |
| <i>P. pungens</i>     | clade I | ST1     | J237Ps03    | 22    | 2020 November 22 | T. Nishimura  | NR       | -        | ND       |
| <i>P. pungens</i>     | clade I | ST1     | J237Ps04    | 22    | 2020 November 22 | T. Nishimura  | NR       | -        | -        |
| <i>P. pungens</i>     | clade I | ST1     | J237Ps06    | 22    | 2020 November 22 | T. Nishimura  | NR       | -        | -        |
| <i>P. pungens</i>     | clade I | ST1     | J237Ps08    | 22    | 2020 November 22 | T. Nishimura  | NR       | -        | -        |
| <i>P. pungens</i>     | clade I | ST2     | G027Ps05    | 12    | 2020 July 07     | T. Nishimura  | LC636550 | -        | ND       |
| <i>P. pungens</i>     | clade I | ST2     | G015Ps02    | 14    | 2020 July 13     | H. Bowers     | LC636551 | -        | ND       |
| <i>P. pungens</i>     | clade I | -       | CAWB130     | Psd-4 | 19               | 2019 May 01   | M. Balci | -        | LC636589 |
| <i>P. pungens</i>     | clade I | -       | CAWB129     | Psd-3 | 20               | 2019 May 01   | M. Balci | -        | LC636590 |
| <i>P. cf. subpaci</i> |         |         | PA030Ps02   | 2     | 2020 June 22     | T. Nishimura  | LC636552 | -        | ND       |
| <i>P. cf. subpaci</i> |         |         | PA030Ps07   | 2     | 2020 June 22     | T. Nishimura  | LC636553 | LC636591 | ND       |
| <i>P. cf. subpaci</i> |         | CAWB148 | PD009Ps04   | 4     | 2020 July 13     | T. Nishimura  | LC636554 | LC636592 | ND       |
| <i>P. cf. subpaci</i> |         |         | 826         | 5     | 2018 or 2019     | S. Challenger | -        | LC636593 | -        |
| <i>P. cf. subpaci</i> |         |         | G011Ps03    | 20    | 2020 June 24     | T. Nishimura  | LC636555 | -        | ND       |

<sup>a</sup> Sequences that were not identical but were not a clade/subclade level divergence were assigned as sequence type (ST).

<sup>b</sup> CICC: the Cawthron Institute Culture Collection of Microalgae.

<sup>c</sup> Sampling site code shown in Figure 4.

<sup>d</sup> DDBJ: the DNA Data Bank of Japan.

<sup>e</sup> Details of the DA and DA isomers analysis are shown in Table S5.

**Table S3.** Average, SD, minimum, and maximum uncorrected *p* distance of the ITS region of selected combinations between *Pseudo-nitzschia* species/clades/subclades. NA: data not available.

| Species/clade/subclade                                          | Species/clade/subclade                                    | Number of positions <sup>a</sup> | Number of combinations | <i>p</i> distance |       |         |         |
|-----------------------------------------------------------------|-----------------------------------------------------------|----------------------------------|------------------------|-------------------|-------|---------|---------|
|                                                                 |                                                           |                                  |                        | Average           | SD    | Minimum | Maximum |
| <i>P. arenysensis</i> clade I                                   | <i>P. arenysensis</i> clade I                             | 690                              | 36                     | 0                 | 0     | 0       | 0       |
|                                                                 | <i>P. arenysensis</i> clade II                            | 690                              | 18                     | 0.045             | 0.005 | 0.040   | 0.052   |
|                                                                 | <i>P. cf. arenysensis</i>                                 | 690                              | 27                     | 0.040             | 0.000 | 0.040   | 0.040   |
| <i>P. arenysensis</i> clade II                                  | <i>P. arenysensis</i> clade II                            | 690                              | 1                      | NA                | NA    | NA      | 0.013   |
|                                                                 | <i>P. cf. arenysensis</i>                                 | 690                              | 6                      | 0.041             | 0.000 | 0.040   | 0.041   |
| <i>P. cf. arenysensis</i>                                       | <i>P. cf. arenysensis</i>                                 | 690                              | 3                      | 0                 | 0     | 0       | 0       |
| <i>P. cuspidata</i> clade I <sup>b</sup>                        | <i>P. cuspidata</i> clade I <sup>b</sup>                  | 724                              | 21                     | 0.009             | 0.006 | 0       | 0.021   |
|                                                                 | <i>P. cuspidata</i> clade II                              | 724                              | 35                     | 0.030             | 0.004 | 0.024   | 0.037   |
|                                                                 | <i>P. pseudodelicatissima</i> <sup>c</sup>                | 724                              | 63                     | 0.031             | 0.003 | 0.026   | 0.037   |
|                                                                 | <i>P. plurisecta</i>                                      | 724                              | 35                     | 0.031             | 0.002 | 0.026   | 0.034   |
| <i>P. cuspidata</i> clade Ia                                    | <i>P. cuspidata</i> clade Ia                              | 724                              | 3                      | 0.001             | 0.001 | 0       | 0.001   |
|                                                                 | <i>P. cuspidata</i> clade Ib                              | 724                              | 12                     | 0.013             | 0.004 | 0.010   | 0.021   |
| <i>P. cuspidata</i> clade Ib                                    | <i>P. cuspidata</i> clade Ib                              | 724                              | 6                      | 0.006             | 0.003 | 0       | 0.010   |
| <i>P. cuspidata</i> clade II                                    | <i>P. cuspidata</i> clade II                              | 724                              | 10                     | 0.012             | 0.008 | 0.003   | 0.024   |
|                                                                 | <i>P. pseudodelicatissima</i> <sup>c</sup>                | 724                              | 45                     | 0.021             | 0.005 | 0.015   | 0.031   |
|                                                                 | <i>P. plurisecta</i>                                      | 724                              | 25                     | 0.036             | 0.003 | 0.030   | 0.041   |
| <i>P. pseudodelicatissima</i> <sup>c</sup>                      | <i>P. pseudodelicatissima</i> <sup>c</sup>                | 724                              | 36                     | 0.004             | 0.003 | 0       | 0.009   |
|                                                                 | <i>P. plurisecta</i>                                      | 724                              | 45                     | 0.034             | 0.004 | 0.027   | 0.039   |
| <i>P. plurisecta</i>                                            | <i>P. plurisecta</i>                                      | 724                              | 10                     | 0.004             | 0.002 | 0       | 0.007   |
| <i>P. decipiens</i> clade A                                     | <i>P. decipiens</i> clade A                               | 644                              | 1                      | NA                | NA    | NA      | 0.005   |
|                                                                 | <i>P. decipiens</i> clade B                               | 644                              | 4                      | 0.027             | 0.002 | 0.023   | 0.030   |
| <i>P. decipiens</i> clade B                                     | <i>P. decipiens</i> clade B                               | 644                              | 1                      | NA                | NA    | NA      | 0.014   |
| <i>P. delicatissima</i> subclade I                              | <i>P. delicatissima</i> subclade I                        | 671                              | 45                     | 0.002             | 0.002 | 0       | 0.005   |
|                                                                 | <i>P. delicatissima</i> subclade II                       | 671                              | 80                     | 0.042             | 0.001 | 0.041   | 0.046   |
|                                                                 | <i>P. delicatissima</i> subclade III                      | 671                              | 60                     | 0.044             | 0.001 | 0.043   | 0.046   |
| <i>P. delicatissima</i> subclade II                             | <i>P. delicatissima</i> subclade II                       | 671                              | 28                     | 0.001             | 0.001 | 0       | 0.003   |
|                                                                 | <i>P. delicatissima</i> subclade III                      | 671                              | 48                     | 0.033             | 0.001 | 0.031   | 0.036   |
| <i>P. delicatissima</i> subclade III                            | <i>P. delicatissima</i> subclade III                      | 671                              | 15                     | 0.001             | 0.001 | 0       | 0.003   |
| Four New Zealand strains of <i>P. delicatissima</i> subclade II | Four other strains of <i>P. delicatissima</i> subclade II | 671                              | 16                     | 0.002             | 0.001 | 0.002   | 0.003   |
| <i>P. galaxiae</i> clade A <sup>d</sup>                         | <i>P. galaxiae</i> clade A <sup>d</sup>                   | 593                              | 1                      | NA                | NA    | NA      | 0.012   |
|                                                                 | <i>P. galaxiae</i> clade B <sup>d</sup>                   | 593                              | 12                     | 0.047             | 0.002 | 0.045   | 0.050   |
|                                                                 | <i>P. galaxiae</i> clade C                                | 593                              | 6                      | 0.068             | 0.004 | 0.064   | 0.072   |
| <i>P. galaxiae</i> clade B <sup>d</sup>                         | <i>P. galaxiae</i> clade B <sup>d</sup>                   | 593                              | 15                     | 0.010             | 0.009 | 0       | 0.024   |
|                                                                 | <i>P. galaxiae</i> clade C                                | 593                              | 18                     | 0.056             | 0.005 | 0.053   | 0.067   |
| <i>P. galaxiae</i> clade C                                      | <i>P. galaxiae</i> clade C                                | 593                              | 3                      | 0                 | 0     | 0       | 0       |
| <i>P. hasleana</i> clade I                                      | <i>P. hasleana</i> clade I                                | 620                              | 36                     | 0.002             | 0.001 | 0       | 0.005   |
|                                                                 | <i>P. hasleana</i> clade II                               | 620                              | 36                     | 0.012             | 0.001 | 0.011   | 0.015   |
| <i>P. hasleana</i> clade II                                     | <i>P. hasleana</i> clade II                               | 620                              | 6                      | 0                 | 0     | 0       | 0       |
| <i>P. pungens</i> clade I                                       | <i>P. pungens</i> clade I                                 | 624                              | 28                     | 0.001             | 0.001 | 0       | 0.003   |
|                                                                 | <i>P. pungens</i> clade II                                | 624                              | 24                     | 0.012             | 0.001 | 0.011   | 0.014   |
|                                                                 | <i>P. pungens</i> clade III <sup>e</sup>                  | 624                              | 72                     | 0.033             | 0.005 | 0.026   | 0.047   |
| <i>P. pungens</i> clade II                                      | <i>P. pungens</i> clade II                                | 624                              | 3                      | 0.001             | 0.001 | 0       | 0.002   |
|                                                                 | <i>P. pungens</i> clade III <sup>e</sup>                  | 624                              | 27                     | 0.035             | 0.005 | 0.027   | 0.048   |
| <i>P. pungens</i> clade III <sup>e</sup>                        | <i>P. pungens</i> clade III <sup>e</sup>                  | 624                              | 36                     | 0.014             | 0.006 | 0       | 0.027   |
| <i>P. pungens</i> clade IIIaa                                   | <i>P. pungens</i> clade IIIaa                             | 624                              | 3                      | 0.006             | 0.001 | 0.005   | 0.008   |
|                                                                 | <i>P. pungens</i> clade IIIab                             | 624                              | 12                     | 0.015             | 0.005 | 0.011   | 0.024   |
|                                                                 | <i>P. pungens</i> clade IIIb                              | 624                              | 6                      | 0.013             | 0.001 | 0.011   | 0.014   |
| <i>P. pungens</i> clade IIIab                                   | <i>P. pungens</i> clade IIIab                             | 624                              | 6                      | 0.010             | 0.005 | 0.005   | 0.016   |
|                                                                 | <i>P. pungens</i> clade IIIb                              | 624                              | 8                      | 0.019             | 0.005 | 0.016   | 0.027   |
| <i>P. pungens</i> clade IIIb                                    | <i>P. pungens</i> clade IIIb                              | 624                              | 1                      | NA                | NA    | NA      | 0       |
| <i>P. simulans</i> subclade I                                   | <i>P. simulans</i> subclade I                             | 703                              | 1                      | NA                | NA    | NA      | 0       |
|                                                                 | <i>P. simulans</i> subclade II                            | 703                              | 4                      | 0.039             | 0.000 | 0.039   | 0.039   |
| <i>P. simulans</i> subclade II                                  | <i>P. simulans</i> subclade II                            | 703                              | 1                      | NA                | NA    | NA      | 0.001   |

<sup>a</sup> Number of positions used for the final data set for the calculation of uncorrected *p* distances.<sup>b</sup> *Pseudo-nitzschia cuspidata* clade I contains clades Ia and Ib. Clade Ib includes two *P. cuspidata* var. *manzanillensis* strains (Ps116 and Ps142) and two *P. cuspidata* strains (MC3041 and MC3207).<sup>c</sup> *Pseudo-nitzschia pseudodelicatissima* includes two *P. cuspidata* strains (Tenerife8 and NWFSC194).<sup>d</sup> *Pseudo-nitzschia galaxiae* clades A and B correspond to clades I and II reported by McDonald et al. (2007), respectively.<sup>e</sup> *Pseudo-nitzschia pungens* clade III contains clades IIIaa, IIIab, and IIIb.

**Table S4.** Average, SD, minimum, and maximum uncorrected *p* distance of the LSU rDNA D1–D3 of selected combinations between *Pseudo-nitzschia hasleana* and several related species. NA: data not available.

| Species/subclade                      | Species/subclade                      | Number of positions <sup>a</sup> | Number of combinations | <i>p</i> distance |         |         |         |
|---------------------------------------|---------------------------------------|----------------------------------|------------------------|-------------------|---------|---------|---------|
|                                       |                                       |                                  |                        | Average           | SD      | Minimum | Maximum |
| <i>P. hasleana</i> clade I            | <i>P. hasleana</i> clade I            | 659                              | 10                     | 0                 | 0       | 0       | 0       |
|                                       | <i>P. hasleana</i> clade II           | 659                              | 10                     | 0.006             | 0       | 0.006   | 0.006   |
|                                       | ' <i>P. calliantha</i> ' <sup>b</sup> | 659                              | 5                      | 0.014             | < 0.001 | 0.014   | 0.014   |
|                                       | <i>P. calliantha</i>                  | 659                              | 25                     | 0.018             | 0.001   | 0.015   | 0.020   |
|                                       | <i>P. mannii</i>                      | 659                              | 10                     | 0.025             | 0.001   | 0.024   | 0.026   |
|                                       | <i>P. limii</i>                       | 659                              | 10                     | 0.007             | 0.001   | 0.006   | 0.008   |
|                                       | <i>P. kodamae</i>                     | 659                              | 10                     | 0.018             | 0       | 0.018   | 0.018   |
| <i>P. hasleana</i> clade II           | <i>P. hasleana</i> clade II           | 659                              | 1                      | NA                | NA      | NA      | 0       |
|                                       | ' <i>P. calliantha</i> ' <sup>b</sup> | 659                              | 2                      | 0.008             | 0       | 0.008   | 0.008   |
|                                       | <i>P. calliantha</i>                  | 659                              | 10                     | 0.019             | 0.001   | 0.017   | 0.020   |
|                                       | <i>P. mannii</i>                      | 659                              | 4                      | 0.027             | 0.001   | 0.026   | 0.027   |
|                                       | <i>P. limii</i>                       | 659                              | 4                      | 0.008             | 0.001   | 0.008   | 0.009   |
|                                       | <i>P. kodamae</i>                     | 659                              | 4                      | 0.021             | 0       | 0.021   | 0.021   |
| ' <i>P. calliantha</i> ' <sup>b</sup> | ' <i>P. calliantha</i> ' <sup>b</sup> | 659                              | NA                     | NA                | NA      | NA      | NA      |
|                                       | <i>P. calliantha</i>                  | 659                              | 5                      | 0.027             | 0.001   | 0.025   | 0.028   |
|                                       | <i>P. mannii</i>                      | 659                              | 2                      | 0.035             | 0.001   | 0.034   | 0.035   |
|                                       | <i>P. limii</i>                       | 659                              | 2                      | 0.016             | 0.001   | 0.015   | 0.017   |
|                                       | <i>P. kodamae</i>                     | 659                              | 2                      | 0.027             | < 0.001 | 0.027   | 0.027   |
| <i>P. calliantha</i>                  | <i>P. calliantha</i>                  | 659                              | 10                     | 0.001             | 0.001   | 0       | 0.003   |
|                                       | <i>P. mannii</i>                      | 659                              | 10                     | 0.016             | 0.001   | 0.014   | 0.018   |
|                                       | <i>P. limii</i>                       | 659                              | 10                     | 0.014             | 0.002   | 0.011   | 0.017   |
|                                       | <i>P. kodamae</i>                     | 659                              | 10                     | 0.027             | 0.001   | 0.024   | 0.029   |
| <i>P. mannii</i>                      | <i>P. mannii</i>                      | 659                              | 1                      | NA                | NA      | NA      | 0.002   |
|                                       | <i>P. limii</i>                       | 659                              | 4                      | 0.018             | 0.001   | 0.017   | 0.020   |
|                                       | <i>P. kodamae</i>                     | 659                              | 4                      | 0.014             | 0.001   | 0.014   | 0.015   |
| <i>P. limii</i>                       | <i>P. limii</i>                       | 659                              | 1                      | NA                | NA      | NA      | 0.002   |
|                                       | <i>P. kodamae</i>                     | 659                              | 4                      | 0.014             | 0.001   | 0.014   | 0.015   |
| <i>P. kodamae</i>                     | <i>P. kodamae</i>                     | 659                              | 1                      | NA                | NA      | NA      | 0.003   |

<sup>a</sup> Number of positions used for the final data set for the calculation of uncorrected *p* distances.<sup>b</sup> '*Pseudo-nitzschia calliantha*' indicates strain CAWB114 from New Zealand (Rhodes et al. 2013).

**Table S5.** Details of 73 clonal strains of *Pseudo-nitzschia* from New Zealand tested for domoic acid (DA) and DA isomers analysis in the present study. 0: no toxins were detected at the limit of detection (LoD). trace: toxin cell quota was detected between LoD and lower limit of quantitation (LLOQ). NA: data not available. NC: data not calculated. Bold letter: detected or quantified value.

| Species                 | Clade/<br>subclade | Sequence<br>type (ST) <sup>a</sup><br>of the ITS | Strain<br>name in<br>CICCM <sup>b</sup> | Strain name  | Medium | Harvested cell<br>number | Number of |                                        | LoD     | LLOQ   | Cell quota (pg cell <sup>-1</sup> ) |        |          |          |          |          |          |      | Proportion (%) |          |          |          |          |          |    |  |
|-------------------------|--------------------|--------------------------------------------------|-----------------------------------------|--------------|--------|--------------------------|-----------|----------------------------------------|---------|--------|-------------------------------------|--------|----------|----------|----------|----------|----------|------|----------------|----------|----------|----------|----------|----------|----|--|
|                         |                    |                                                  |                                         |              |        |                          | Day       | months after<br>isolation <sup>c</sup> |         |        | DA                                  | epi-DA | iso-DA A | iso-DA B | iso-DA C | iso-DA D | iso-DA E | DA   | epi-DA         | iso-DA A | iso-DA B | iso-DA C | iso-DA D | iso-DA E |    |  |
| <i>P. americana</i>     |                    |                                                  |                                         | PB024Ps03    | f/2-Si | 9,653,333                | 9         | 3                                      | 0.00005 | 0.0005 | 0                                   | 0      | 0        | 0        | 0        | 0        | 0        | 0    | NA             | NA       | NA       | NA       | NA       | NA       | NA |  |
| <i>P. americana</i>     |                    |                                                  |                                         | G005Ps02     | f/2-Si | 7,056,000                | 10        | 8                                      | 0.00005 | 0.0005 | 0                                   | 0      | 0        | 0        | 0        | 0        | 0        | 0    | NA             | NA       | NA       | NA       | NA       | NA       | NA |  |
| <i>P. americana</i>     |                    |                                                  | CAWB138                                 | G018Ps01     | f/2-Si | 8,576,000                | 9         | 3                                      | 0.00005 | 0.0005 | 0                                   | 0      | 0        | 0        | 0        | 0        | 0        | 0    | NA             | NA       | NA       | NA       | NA       | NA       | NA |  |
| <i>P. americana</i>     |                    |                                                  |                                         | G031Ps01     | f/2-Si | 8,224,000                | 10        | 7                                      | 0.00005 | 0.0005 | 0                                   | 0      | 0        | 0        | 0        | 0        | 0        | 0    | NA             | NA       | NA       | NA       | NA       | NA       | NA |  |
| <i>P. arenysensis</i>   | clade I            |                                                  | CAWB139                                 | PA030Ps01    | f/2-Si | 13,813,333               | 9         | 4                                      | 0.00005 | 0.0005 | 0                                   | 0      | 0        | 0        | 0        | 0        | 0        | 0    | NA             | NA       | NA       | NA       | NA       | NA       | NA |  |
|                         |                    |                                                  |                                         |              | f/2-Si | 2,288,000                | 43        | 5                                      | 0.00005 | 0.0005 | 0                                   | 0      | 0        | 0        | 0        | 0        | 0        | 0    | NA             | NA       | NA       | NA       | NA       | NA       | NA |  |
| <i>P. arenysensis</i>   | clade I            |                                                  |                                         | PA030Ps04    | f/2-Si | 9,226,667                | 9         | 4                                      | 0.00005 | 0.0005 | 0                                   | 0      | 0        | 0        | 0        | 0        | 0        | 0    | NA             | NA       | NA       | NA       | NA       | NA       | NA |  |
|                         |                    |                                                  |                                         |              | f/2-Si | 1,981,333                | 43        | 5                                      | 0.00005 | 0.0005 | 0                                   | 0      | 0        | 0        | 0        | 0        | 0        | 0    | NA             | NA       | NA       | NA       | NA       | NA       | NA |  |
| <i>P. arenysensis</i>   | clade I            |                                                  | CAWB131                                 | Psd-5        | f/2    | 16,350,000               | 10        | 14                                     | 0.0005  | 0.0025 | 0                                   | 0      | 0        | 0        | 0        | 0        | 0        | 0    | NA             | NA       | NA       | NA       | NA       | NA       | NA |  |
| <i>P. arenysensis</i>   | clade I            |                                                  | CAWB132                                 | Psd-6        | f/2    | 37,050,000               | 10        | 14                                     | 0.0005  | 0.0025 | 0                                   | 0      | 0        | 0        | 0        | 0        | 0        | 0    | NA             | NA       | NA       | NA       | NA       | NA       | NA |  |
|                         |                    |                                                  |                                         |              | f/2-Si | 18,144,000               | 10        | 22                                     | 0.00005 | 0.0005 | 0                                   | 0      | 0        | 0        | 0        | 0        | 0        | 0    | NA             | NA       | NA       | NA       | NA       | NA       | NA |  |
| <i>P. arenysensis</i>   | clade I            |                                                  | CAWB133                                 | Psd-7        | f/2    | 55,500,000               | 10        | 14                                     | 0.0005  | 0.0025 | 0                                   | 0      | 0        | 0        | 0        | 0        | 0        | 0    | NA             | NA       | NA       | NA       | NA       | NA       | NA |  |
| <i>P. arenysensis</i>   | clade I            |                                                  | CAWB134                                 | Psd-8        | f/2    | 20,550,000               | 10        | 14                                     | 0.0005  | 0.0025 | 0                                   | 0      | 0        | 0        | 0        | 0        | 0        | 0    | NA             | NA       | NA       | NA       | NA       | NA       | NA |  |
| <i>P. australis</i>     |                    | ST1                                              |                                         | PD009Ps05    | f/2-Si | 1,260,000                | 9         | 3                                      | 0.00008 | 0.0008 | 0.27                                | 0      | 0.009    | trace    | 0.119    | 0        | 0        | 68.1 | NA             | 2.3      | NC       | 29.7     | NA       | NA       | NA |  |
| <i>P. australis</i>     |                    | ST1                                              | CAWB140                                 | G007Ps03     | f/2-Si | 420,000                  | 9         | 4                                      | 0.0002  | 0.002  | 0.06                                | 0      | 0.003    | trace    | 0.021    | 0        | 0        | 72.6 | NA             | 3.0      | NC       | 24.4     | NA       | NA       | NA |  |
| <i>P. australis</i>     |                    | ST1                                              |                                         | G027Ps01     | f/2-Si | 573,333                  | 9         | 3                                      | 0.0002  | 0.002  | 0.73                                | 0      | 0.024    | trace    | 0.884    | 0        | 0        | 44.4 | NA             | 1.5      | NC       | 54.1     | NA       | NA       | NA |  |
| <i>P. australis</i>     |                    | ST1                                              |                                         | G015Ps04     | f/2-Si | 304,000                  | 9         | 3                                      | 0.0003  | 0.003  | 0.05                                | 0      | 0        | trace    | 0.010    | 0        | 0        | 83.2 | NA             | NA       | NC       | 16.8     | NA       | NA       | NA |  |
|                         |                    |                                                  |                                         |              | f/2-Si | 1,506,667                | 10        | 7                                      | 0.00007 | 0.0007 | 0.004                               | 0      | trace    | trace    | 0.002    | 0        | 0        | 67.1 | NA             | NC       | NC       | 32.9     | NA       | NA       | NA |  |
| <i>P. australis</i>     | ST1                |                                                  |                                         | G037Ps01     | f/2-Si | 966,667                  | 9         | 3                                      | 0.0001  | 0.001  | 0.09                                | 0      | 0.003    | trace    | 0.051    | 0        | 0        | 62.1 | NA             | 2.2      | NC       | 35.8     | NA       | NA       | NA |  |
| <i>P. australis</i>     | ST1                |                                                  |                                         | J328Ps20     | f/2-Si | 580,000                  | 10        | 3                                      | 0.0002  | 0.002  | 0.14                                | trace  | 0.006    | trace    | 0.007    | trace    | trace    | 91.5 | NC             | 3.7      | NC       | 4.8      | NC       | NC       | NC |  |
| <i>P. australis</i>     | ST1                |                                                  |                                         | J237Ps07     | f/2-Si | 372,000                  | 10        | 3                                      | 0.0003  | 0.003  | 2.02                                | 0.010  | 0.060    | trace    | 0.118    | 0.003    | trace    | 91.3 | 0.4            | 2.7      | NC       | 5.4      | 0.1      | NC       | NC |  |
| <i>P. australis</i>     | ST2                |                                                  |                                         | G018Ps02     | f/2-Si | 1,173,333                | 9         | 3                                      | 0.00009 | 0.0009 | 0.04                                | 0      | 0.001    | trace    | 0.006    | 0        | 0        | 83.8 | NA             | 2.7      | NC       | 13.5     | NA       | NA       | NA |  |
| <i>P. australis</i>     | ST2                |                                                  |                                         | G018Ps04     | f/2-Si | 392,000                  | 10        | 7                                      | 0.0003  | 0.003  | 0.11                                | 0      | 0.003    | trace    | 0.050    | trace    | 0        | 67.9 | NA             | 2.0      | NC       | 30.1     | NC       | NA       | NA |  |
| <i>P. calliantha</i>    | ST1                |                                                  | CAWB135                                 | Crail Bay    | f/2    | 41,400,000               | 10        | 5                                      | 0.0005  | 0.0025 | 0                                   | 0      | 0        | 0        | 0        | 0        | 0        | 0    | NA             | NA       | NA       | NA       | NA       | NA       | NA |  |
|                         |                    |                                                  |                                         |              | f/2-Si | 6,240,000                | 9         | 9                                      | 0.00005 | 0.0005 | 0                                   | 0      | 0        | 0        | 0        | 0        | 0        | 0    | NA             | NA       | NA       | NA       | NA       | NA       | NA |  |
| <i>P. calliantha</i>    | ST2                |                                                  |                                         | Waitaria Bay | f/2    | 39,300,000               | 10        | 8                                      | 0.0005  | 0.0025 | 0                                   | 0      | 0        | 0        | 0        | 0        | 0        | 0    | NA             | NA       | NA       | NA       | NA       | NA       | NA |  |
|                         |                    |                                                  |                                         |              | f/2-Si | 11,386,667               | 9         | 12                                     | 0.00005 | 0.0005 | 0                                   | 0      | 0        | 0        | 0        | 0        | 0        | 0    | NA             | NA       | NA       | NA       | NA       | NA       | NA |  |
| <i>P. calliantha</i>    | ST3                |                                                  |                                         | Richmond Bay | f/2    | 40,800,000               | 10        | 5                                      | 0.0005  | 0.0025 | 0                                   | 0      | 0        | 0        | 0        | 0        | 0        | 0    | NA             | NA       | NA       | NA       | NA       | NA       | NA |  |
|                         |                    |                                                  |                                         |              | f/2-Si | 13,216,000               | 10        | 13                                     | 0.00005 | 0.0005 | 0                                   | 0      | 0        | 0        | 0        | 0        | 0        | 0    | NA             | NA       | NA       | NA       | NA       | NA       | NA |  |
| <i>P. cuspidata</i>     | clade Ia           |                                                  | CAWB141                                 | PA030Ps10    | f/2-Si | 12,026,667               | 9         | 4                                      | 0.00005 | 0.0005 | 0                                   | 0      | 0        | 0        | 0        | 0        | 0        | 0    | NA             | NA       | NA       | NA       | NA       | NA       | NA |  |
|                         |                    |                                                  |                                         |              | f/2-Si | 1,317,333                | 43        | 5                                      | 0.00008 | 0.0008 | trace                               | 0      | 0        | 0        | 0        | 0        | 0        | 0    | NC             | NA       | NA       | NA       | NA       | NA       | NA |  |
| <i>P. delicatissima</i> | subclade I         |                                                  | CAWB136                                 | PA014Ps04    | f/2    | 120,900,000              | 10        | 5                                      | 0.0005  | 0.0025 | 0                                   | 0      | 0        | 0        | 0        | 0        | 0        | 0    | NA             | NA       | NA       | NA       | NA       | NA       | NA |  |
|                         |                    |                                                  |                                         |              | f/2-Si | 29,333,333               | 9         | 9                                      | 0.00005 | 0.0005 | 0                                   | 0      | 0        | 0        | 0        | 0        | 0        | 0    | NA             | NA       | NA       | NA       | NA       | NA       | NA |  |
| <i>P. delicatissima</i> | subclade I         |                                                  |                                         | PA014Ps05    | f/2    | 52,125,000               | 10        | 5                                      | 0.0005  | 0.0025 | 0                                   | 0      | 0        | 0        | 0        | 0        | 0        | 0    | NA             | NA       | NA       | NA       | NA       | NA       | NA |  |
|                         |                    |                                                  |                                         |              | f/2-Si | 4,213,333                | 9         | 9                                      | 0.00005 | 0.0005 | 0                                   | 0      | 0        | 0        | 0        | 0        | 0        | 0    | NA             | NA       | NA       | NA       | NA       | NA       | NA |  |
| <i>P. delicatissima</i> | subclade I         |                                                  |                                         | PA014Ps11    | f/2    | 102,000,000              | 10        | 5                                      | 0.0005  | 0.0025 | 0                                   | 0      | 0        | 0        | 0        | 0        | 0        | 0    | NA             | NA       | NA       | NA       | NA       | NA       | NA |  |
| <i>P. delicatissima</i> | subclade I         |                                                  | CAWB142                                 | PA030Ps06    | f/2-Si | 5,093,333                | 9         | 4                                      | 0.00005 | 0.0005 | 0                                   | 0      | 0        | 0        | 0        | 0        | 0        | 0    | NA             | NA       | NA       | NA       | NA       | NA       | NA |  |
| <i>P. delicatissima</i> | subclade I         |                                                  |                                         | PA030Ps11    | f/2-Si | 13,066,667               | 9         | 4                                      | 0.00005 | 0.0005 | 0                                   | 0      | 0        | 0        | 0        | 0        | 0        | 0    | NA             | NA       | NA       | NA       | NA       | NA       | NA |  |
| <i>P. delicatissima</i> | subclade II        |                                                  | CAWB143                                 | G013Ps03     | f/2-Si | 12,880,000               | 9         | 4                                      | 0.00005 | 0.0005 | 0                                   | 0      | 0        | 0        | 0        | 0        | 0        | 0    | NA             | NA       | NA       | NA       | NA       | NA       | NA |  |
|                         |                    |                                                  |                                         |              | f/2-Si | 853,333                  | 43        | 5                                      | 0.0001  | 0.001  | 0                                   | 0      | 0        | 0        | 0        | 0        | 0        | 0    | NA             | NA       | NA       | NA       | NA       | NA       | NA |  |
| <i>P. delicatissima</i> | subclade II        |                                                  |                                         | G013Ps04     | f/2-Si | 17,386,667               | 9         | 4                                      | 0.00005 | 0.0005 | 0                                   | 0      | 0        | 0        | 0        | 0        | 0        | 0    | NA             | NA       | NA       | NA       | NA       | NA       | NA |  |
|                         |                    |                                                  |                                         |              | f/2-Si | 829,333                  | 43        | 5                                      | 0.0001  | 0.001  | 0                                   | 0      | 0        | 0        | 0        | 0        | 0        | 0    | NA             | NA       | NA       | NA       | NA       | NA       | NA |  |
| <i>P. delicatissima</i> | subclade II        |                                                  | CAWB144                                 | J328Ps01     | f/2-Si | 10,666,667               | 9         | 3                                      | 0.00005 | 0.0005 | 0                                   | 0      | 0        | 0        | 0        | 0        | 0        | 0    | NA             | NA       | NA       | NA       | NA       | NA       | NA |  |
|                         |                    |                                                  |                                         |              | f/2-Si | 3,280,000                | 43        | 4                                      | 0.00005 | 0.0005 | 0                                   | 0      | 0        | 0        | 0        | 0        | 0        | 0    | NA             | NA       | NA       | NA       | NA       | NA       | NA |  |



|                         |             |          |             |            |             |           |         |         |         |        |                 |       |       |                 |       |       |      |     |     |    |     |     |     |
|-------------------------|-------------|----------|-------------|------------|-------------|-----------|---------|---------|---------|--------|-----------------|-------|-------|-----------------|-------|-------|------|-----|-----|----|-----|-----|-----|
| <i>P. delicatissima</i> | subclade II | J328Ps02 | f/2-Si      | 15,680,000 | 9           | 3         | 0.00005 | 0.0005  | 0       | 0      | 0               | 0     | 0     | 0               | 0     | 0     | NA   | NA  | NA  | NA | NA  | NA  | NA  |
|                         |             |          | f/2-Si      | 3,440,000  | 43          | 4         | 0.00005 | 0.0005  | 0       | 0      | 0               | 0     | 0     | 0               | 0     | 0     | NA   | NA  | NA  | NA | NA  | NA  | NA  |
| <i>P. fraudulenta</i>   |             | G013Ps02 | f/2-Si      | 1,328,000  | 10          | 8         | 0.00008 | 0.0008  | 0       | 0      | 0               | 0     | 0     | 0               | 0     | 0     | NA   | NA  | NA  | NA | NA  | NA  | NA  |
| <i>P. fraudulenta</i>   | CAWB145     | G015Ps01 | f/2-Si      | 1,306,667  | 9           | 3         | 0.00008 | 0.0008  | 0       | 0      | 0               | 0     | 0     | 0               | 0     | 0     | NA   | NA  | NA  | NA | NA  | NA  | NA  |
| <i>P. fraudulenta</i>   |             | G011Ps04 | f/2-Si      | 4,640,000  | 9           | 4         | 0.00005 | 0.0005  | 0       | 0      | 0               | 0     | 0     | 0               | 0     | 0     | NA   | NA  | NA  | NA | NA  | NA  | NA  |
| <i>P. fraudulenta</i>   |             | J328Ps16 | f/2-Si      | 1,200,000  | 10          | 3         | 0.00008 | 0.0008  | 0       | 0      | 0               | 0     | 0     | 0               | 0     | 0     | NA   | NA  | NA  | NA | NA  | NA  | NA  |
| <i>P. fraudulenta</i>   | CAWB128     | Kiwa1    | f/2         | 82,200,000 | 10          | 15        | 0.0005  | 0.0025  | 0       | 0      | 0               | 0     | 0     | 0               | 0     | 0     | NA   | NA  | NA  | NA | NA  | NA  | NA  |
| <i>P. galaxiae</i>      | clade B     | CAWB153  | PA014Ps01   | f/2        | 121,500,000 | 10        | 5       | 0.0005  | 0.0025  | 0      | 0               | 0     | 0     | 0               | 0     | 0     | NA   | NA  | NA  | NA | NA  | NA  | NA  |
|                         |             |          | f/2-Si      | 70,666,667 | 9           | 9         | 0.00005 | 0.0005  | 0       | 0      | 0               | 0     | 0     | 0               | 0     | 0     | NA   | NA  | NA  | NA | NA  | NA  | NA  |
|                         |             |          | f/2-Si      | 4,560,000  | 43          | 10        | 0.00005 | 0.0005  | 0       | 0      | 0               | 0     | 0     | 0               | 0     | 0     | NA   | NA  | NA  | NA | NA  | NA  | NA  |
| <i>P. galaxiae</i>      | clade B     | CAWB154  | PA014Ps07   | f/2        | 213,750,000 | 10        | 5       | 0.0005  | 0.0025  | 0      | 0               | 0     | 0     | 0               | 0     | 0     | NA   | NA  | NA  | NA | NA  | NA  | NA  |
|                         |             |          | f/2-Si      | 39,733,333 | 9           | 9         | 0.00005 | 0.0005  | 0       | 0      | 0               | 0     | 0     | 0               | 0     | 0     | NA   | NA  | NA  | NA | NA  | NA  | NA  |
|                         |             |          | f/2-Si      | 3,040,000  | 43          | 10        | 0.00005 | 0.0005  | 0       | 0      | 0               | 0     | 0     | 0               | 0     | 0     | NA   | NA  | NA  | NA | NA  | NA  | NA  |
| <i>P. hasleana</i>      | clade I     | CAWB146  | G007Ps01    | f/2-Si     | 426,667     | 9         | 4       | 0.0002  | 0.002   | 0      | 0               | 0     | 0     | 0               | 0     | 0     | NA   | NA  | NA  | NA | NA  | NA  | NA  |
|                         |             |          | f/2-Si      | 304,000    | 43          | 5         | 0.0003  | 0.003   | 0       | 0      | 0               | 0     | 0     | 0               | 0     | 0     | NA   | NA  | NA  | NA | NA  | NA  | NA  |
| <i>P. hasleana</i>      | clade I     | CAWB147  | G007Ps02    | f/2-Si     | 1,866,667   | 9         | 4       | 0.00005 | 0.0005  | 0      | 0               | 0     | 0     | 0               | 0     | 0     | NA   | NA  | NA  | NA | NA  | NA  | NA  |
|                         |             |          | f/2-Si      | 955,200    | 43          | 5         | 0.0001  | 0.001   | 0       | 0      | 0               | 0     | 0     | 0               | 0     | 0     | NA   | NA  | NA  | NA | NA  | NA  | NA  |
| <i>P. hasleana</i>      | clade II    | CAWB156  | J328Ps15    | f/2-Si     | 8,026,667   | 10        | 3       | 0.00005 | 0.0005  | 0      | 0               | 0     | 0     | 0               | 0     | 0     | NA   | NA  | NA  | NA | NA  | NA  | NA  |
|                         |             |          | f/2-Si      | 6,032,000  | 13          | 3         | 0.00005 | 0.0005  | 0       | 0      | 0               | 0     | 0     | 0               | 0     | 0     | NA   | NA  | NA  | NA | NA  | NA  | NA  |
|                         |             |          | f/2-Si      | 6,336,000  | 43          | 4         | 0.00005 | 0.0005  | 0       | 0      | 0               | 0     | 0     | 0               | 0     | 0     | NA   | NA  | NA  | NA | NA  | NA  | NA  |
|                         |             |          | K           | 23,386,667 | 12          | 3         | 0.00005 | 0.0005  | 0       | 0      | 0               | 0     | 0     | 0               | 0     | 0     | NA   | NA  | NA  | NA | NA  | NA  | NA  |
| <i>P. hasleana</i>      | clade II    | CAWB155  | J237Ps05    | f/2-Si     | 11,792,000  | 10        | 3       | 0.00005 | 0.0005  | 0      | 0               | 0     | 0     | 0               | 0     | 0     | NA   | NA  | NA  | NA | NA  | NA  | NA  |
|                         |             |          | f/2-Si      | 3,008,000  | 13          | 3         | 0.00005 | 0.0005  | 0       | 0      | 0               | 0     | 0     | 0               | 0     | 0     | NA   | NA  | NA  | NA | NA  | NA  | NA  |
|                         |             |          | K           | 8,016,000  | 12          | 3         | 0.00005 | 0.0005  | 0       | 0      | 0               | 0     | 0     | 0               | 0     | 0     | NA   | NA  | NA  | NA | NA  | NA  | NA  |
| <i>P. multiseris</i>    |             | CAWB149  | G001Ps03    | f/2-Si     | 2,896,000   | 9         | 4       | 0.00005 | 0.0005  | 1.65   | 0.012           | 0.045 | 0     | 0               | 0.020 | 0.003 | 95.4 | 0.7 | 2.6 | NA | NA  | 1.2 | 0.2 |
| <i>P. multiseris</i>    |             |          | G001Ps04    | f/2-Si     | 3,024,000   | 10        | 8       | 0.00005 | 0.0005  | 0.47   | 0.002           | 0.014 | trace | 0.012           | 0.003 | trace | 94.1 | 0.3 | 2.8 | NC | 2.3 | 0.5 | NC  |
| <i>P. multiseris</i>    |             |          | G007Ps04    | f/2-Si     | 1,306,667   | 9         | 4       | 0.00008 | 0.0008  | 2.05   | NC <sup>d</sup> | 0.059 | 0     | NC <sup>d</sup> | 0.012 | 0.002 | 96.5 | NC  | 2.8 | NA | NC  | 0.6 | 0.1 |
| <i>P. multiseris</i>    |             |          | G010Ps10    | f/2-Si     | 1,006,667   | 9         | 4       | 0.0001  | 0.001   | 7.20   | 0               | 0.206 | 0     | 0.239           | 0.019 | 0.005 | 93.9 | NA  | 2.7 | NA | 3.1 | 0.3 | 0.1 |
| <i>P. multistriata</i>  | ST1         | CAWB137  | PA014Ps09   | f/2        | 51,150,000  | 10        | 5       | 0.0005  | 0.0025  | 0      | 0               | 0     | 0     | 0               | 0     | 0     | NA   | NA  | NA  | NA | NA  | NA  | NA  |
| <i>P. multistriata</i>  | ST1         |          | PA014Ps10   | f/2        | 51,562,500  | 10        | 5       | 0.0005  | 0.0025  | 0      | 0               | 0     | 0     | 0               | 0     | 0     | NA   | NA  | NA  | NA | NA  | NA  | NA  |
|                         |             |          | f/2-Si      | 10,506,667 | 8           | 11        | 0.00005 | 0.0005  | 0       | 0      | 0               | 0     | 0     | 0               | 0     | 0     | NA   | NA  | NA  | NA | NA  | NA  | NA  |
| <i>P. multistriata</i>  | ST1         | CAWB150  | PB024Ps01   | f/2-Si     | 10,240,000  | 9         | 4       | 0.00005 | 0.0005  | 0      | 0               | 0     | 0     | 0               | 0     | 0     | NA   | NA  | NA  | NA | NA  | NA  | NA  |
| <i>P. multistriata</i>  | ST1         |          | G013Ps21    | f/2-Si     | 7,013,333   | 9         | 4       | 0.00005 | 0.0005  | 0      | 0               | 0     | 0     | 0               | 0     | 0     | NA   | NA  | NA  | NA | NA  | NA  | NA  |
| <i>P. multistriata</i>  | ST1         |          | G027Ps06    | f/2-Si     | 3,040,000   | 8         | 5       | 0.00005 | 0.0005  | trace  | 0               | trace | 0     | 0               | 0     | 0     | NC   | NA  | NC  | NA | NA  | NA  | NA  |
| <i>P. multistriata</i>  | ST2         | CAWB127  | 827         | f/2        | 50,700,000  | 10        | 19      | 0.0005  | 0.0025  | 0      | 0               | 0     | 0     | 0               | 0     | 0     | NA   | NA  | NA  | NA | NA  | NA  | NA  |
| <i>P. multistriata</i>  | ST2         |          | G001Ps01    | f/2-Si     | 4,213,333   | 8         | 6       | 0.00005 | 0.0005  | trace  | 0               | trace | 0     | 0               | 0     | 0     | NC   | NA  | NC  | NA | NA  | NA  | NA  |
| <i>P. multistriata</i>  | ST2         |          | G001Ps02    | f/2-Si     | 11,216,000  | 10        | 8       | 0.00005 | 0.0005  | 0      | 0               | 0     | 0     | 0               | 0     | 0     | NA   | NA  | NA  | NA | NA  | NA  | NA  |
| <i>P. plurisecta</i>    |             | CAWB151  | G027Ps03    | f/2-Si     | 7,733,333   | 9         | 3       | 0.00005 | 0.0005  | 0      | 0               | 0     | 0     | 0               | 0     | 0     | NA   | NA  | NA  | NA | NA  | NA  | NA  |
|                         |             |          | f/2-Si      | 962,667    | 43          | 4         | 0.0001  | 0.001   | 0       | 0      | 0               | 0     | 0     | 0               | 0     | 0     | NA   | NA  | NA  | NA | NA  | NA  | NA  |
| <i>P. pungens</i>       | clade I     | ST1      | CAWB152     | PA030Ps03  | f/2-Si      | 953,333   | 9       | 4       | 0.0001  | 0.001  | 0               | 0     | 0     | 0               | 0     | 0     | NA   | NA  | NA  | NA | NA  | NA  | NA  |
| <i>P. pungens</i>       | clade I     | ST1      |             | G007Ps06   | f/2-Si      | 3,536,000 | 10      | 8       | 0.00005 | 0.0005 | 0               | 0     | 0     | 0               | 0     | 0     | NA   | NA  | NA  | NA | NA  | NA  | NA  |
| <i>P. pungens</i>       | clade I     | ST1      |             | G005Ps01   | f/2-Si      | 3,216,000 | 10      | 8       | 0.00005 | 0.0005 | 0               | 0     | 0     | 0               | 0     | 0     | NA   | NA  | NA  | NA | NA  | NA  | NA  |
| <i>P. pungens</i>       | clade I     | ST1      |             | G010Ps01   | f/2-Si      | 3,744,000 | 10      | 8       | 0.00005 | 0.0005 | 0               | 0     | 0     | 0               | 0     | 0     | NA   | NA  | NA  | NA | NA  | NA  | NA  |
| <i>P. pungens</i>       | clade I     | ST1      |             | G018Ps05   | f/2-Si      | 1,664,000 | 10      | 7       | 0.00006 | 0.0006 | 0               | 0     | 0     | 0               | 0     | 0     | NA   | NA  | NA  | NA | NA  | NA  | NA  |
| <i>P. pungens</i>       | clade I     | ST1      | Beatrix Bay | f/2        | 8,100,000   | 10        | 8       | 0.0005  | 0.0025  | 0      | 0               | 0     | 0     | 0               | 0     | 0     | NA   | NA  | NA  | NA | NA  | NA  | NA  |
| <i>P. pungens</i>       | clade I     | ST1      |             | G011Ps01   | f/2-Si      | 1,368,000 | 9       | 4       | 0.00007 | 0.0007 | 0               | 0     | 0     | 0               | 0     | 0     | NA   | NA  | NA  | NA | NA  | NA  | NA  |
| <i>P. pungens</i>       | clade I     | ST1      |             | J328Ps21   | f/2-Si      | 380,000   | 10      | 3       | 0.0003  | 0.003  | 0               | 0     | 0     | 0               | 0     | 0     | NA   | NA  | NA  | NA | NA  | NA  | NA  |
| <i>P. pungens</i>       | clade I     | ST1      |             | J237Ps03   | f/2-Si      | 555,000   | 10      | 3       | 0.0002  | 0.002  | 0               | 0     | 0     | 0               | 0     | 0     | NA   | NA  | NA  | NA | NA  | NA  | NA  |
| <i>P. pungens</i>       | clade I     | ST2      |             | G027Ps05   | f/2-Si      | 1,216,000 | 10      | 7       | 0.00008 | 0.0008 | 0               | 0     | 0     | 0               | 0     | 0     | NA   | NA  | NA  | NA | NA  | NA  | NA  |

|                       |         |         |           |                |             |            |    |         |        |        |   |   |   |   |   |   |   |    |    |    |    |    |    |    |
|-----------------------|---------|---------|-----------|----------------|-------------|------------|----|---------|--------|--------|---|---|---|---|---|---|---|----|----|----|----|----|----|----|
| <i>P. pungens</i>     | clade I | ST2     | G015Ps02  | <i>t</i> /2–Si | 1,824,000   | 10         | 7  | 0.00005 | 0.0005 | 0      | 0 | 0 | 0 | 0 | 0 | 0 | 0 | NA |
| <i>P. pungens</i>     | clade I | Unknown | CAWB129   | Ps0-3          | <i>t</i> /2 | 16,020,000 | 10 | 13      | 0.0005 | 0.0025 | 0 | 0 | 0 | 0 | 0 | 0 | 0 | NA |
| <i>P. pungens</i>     | clade I | Unknown | CAWB130   | Ps0-4          | <i>t</i> /2 | 8,700,000  | 10 | 13      | 0.0005 | 0.0025 | 0 | 0 | 0 | 0 | 0 | 0 | 0 | NA |
| <i>P. cf. subpaci</i> |         |         | PA030Ps02 | <i>t</i> /2–Si | 3,453,333   | 9          | 4  | 0.00005 | 0.0005 | 0      | 0 | 0 | 0 | 0 | 0 | 0 | 0 | NA |
| <i>P. cf. subpaci</i> |         |         | PA030Ps07 | <i>t</i> /2–Si | 3,440,000   | 10         | 8  | 0.00005 | 0.0005 | 0      | 0 | 0 | 0 | 0 | 0 | 0 | 0 | NA |
| <i>P. cf. subpaci</i> |         | CAWB148 | PD009Ps04 | <i>t</i> /2–Si | 3,813,333   | 9          | 3  | 0.00005 | 0.0005 | 0      | 0 | 0 | 0 | 0 | 0 | 0 | 0 | NA |
| <i>P. cf. subpaci</i> |         |         | G011Ps03  | <i>t</i> /2–Si | 4,080,000   | 9          | 4  | 0.00005 | 0.0005 | 0      | 0 | 0 | 0 | 0 | 0 | 0 | 0 | NA |

<sup>a</sup> Sequences that were not identical but were not a clade/subclade level divergence were assigned as sequence type (ST).

<sup>b</sup> CICCM: the Cawthron Institute Culture Collection of Microalgae.

<sup>c</sup> The number of months took after isolation at the time of cultivation for DA and DA isomers analysis.

<sup>d</sup> Possible mix of epi-DA and iso-DA C was detected. These analogues co-eluted and could not be differentiated from each other for this sample.
